# Supplementary material for: Similarities and differences between Mn(ii) and Zn(ii) coordination polymers supported by porphyrin-based ligands: synthesis, structures and nonlinear optical properties
Source: Royal Society of Chemistry journal article supplement (doi:10.1039/d0dt02450c), 2020-01-01
Supplement: d0dt02450c1.pdf [file d0dt02450c1.pdf]

*Electronic Supplementary Information*

**Similarities and differences between Mn(II) and Zn(II) coordination polymers supported by porphyrin-based ligands: Synthesis, structures and nonlinear optical properties**

Bo-Wei Xu, Ru-Jie Niu, Quan Liu,\* Jun-Yi Yang,\* Wen-Hua Zhang\* and David J. Young

**Contents**

|                                                                                                                                                                                                                                                                                                                                                                                                                                                                        |   |
|------------------------------------------------------------------------------------------------------------------------------------------------------------------------------------------------------------------------------------------------------------------------------------------------------------------------------------------------------------------------------------------------------------------------------------------------------------------------|---|
| <b>Fig. S1</b> TGA diagrams of Mn-TMPP ( <b>1</b> , a), Zn-TMPP ( <b>2</b> , b), Mn-THPP ( <b>3</b> , c) and Zn-THPP ( <b>4</b> , d). .....                                                                                                                                                                                                                                                                                                                            | 2 |
| <b>Fig. S2</b> The crystal packing diagrams of Mn-TMPP ( <b>1</b> , a, b) and Zn-TMPP ( <b>2</b> , c, d) showing the nearly identical packing patterns when looking along the crystallographic <i>b</i> direction (a, c) and <i>c</i> direction (b, d). Colour codes: Mn (dark magenta), Zn (red), C (gray), N (cyan). The bond colors of adjacent layers are also distinguished by orange and bamboo for clarity. All disordered domain and H atoms are omitted. .... | 3 |
| <b>Fig. S3</b> Expanded UV-Vis spectra showing the Q-band region of CPs <b>1–4</b> and their respective free-bases TMPP and THPP for comparison. ....                                                                                                                                                                                                                                                                                                                  | 4 |
| <b>Fig. S4</b> XPS spectra of MOFs <b>1</b> and <b>3</b> showing the presence of both Mn(II) and Mn(III) in the bulk samples. ....                                                                                                                                                                                                                                                                                                                                     | 5 |
| <b>Fig. S5</b> Z-scan data of <b>1–4</b> ( $1.0 \times 10^{-5}$ mol·L <sup>-1</sup> , DMF solution) at 532 nm. Normalized Z-scan data under open-aperture conditions for <b>1–4</b> (a, c, e, and g). Curves obtained by dividing the normalized Z-scan data under closed aperture configuration by that in a, c, e, g (b, d, f, and h). The blue triangles are the experimental data, and the red solid curve is the theoretical fit. ....                            | 6 |
| <b>Table S1</b> Selected bond lengths (Å) and bond angles (°) for CPs <b>1–4</b> . ....                                                                                                                                                                                                                                                                                                                                                                                | 7 |

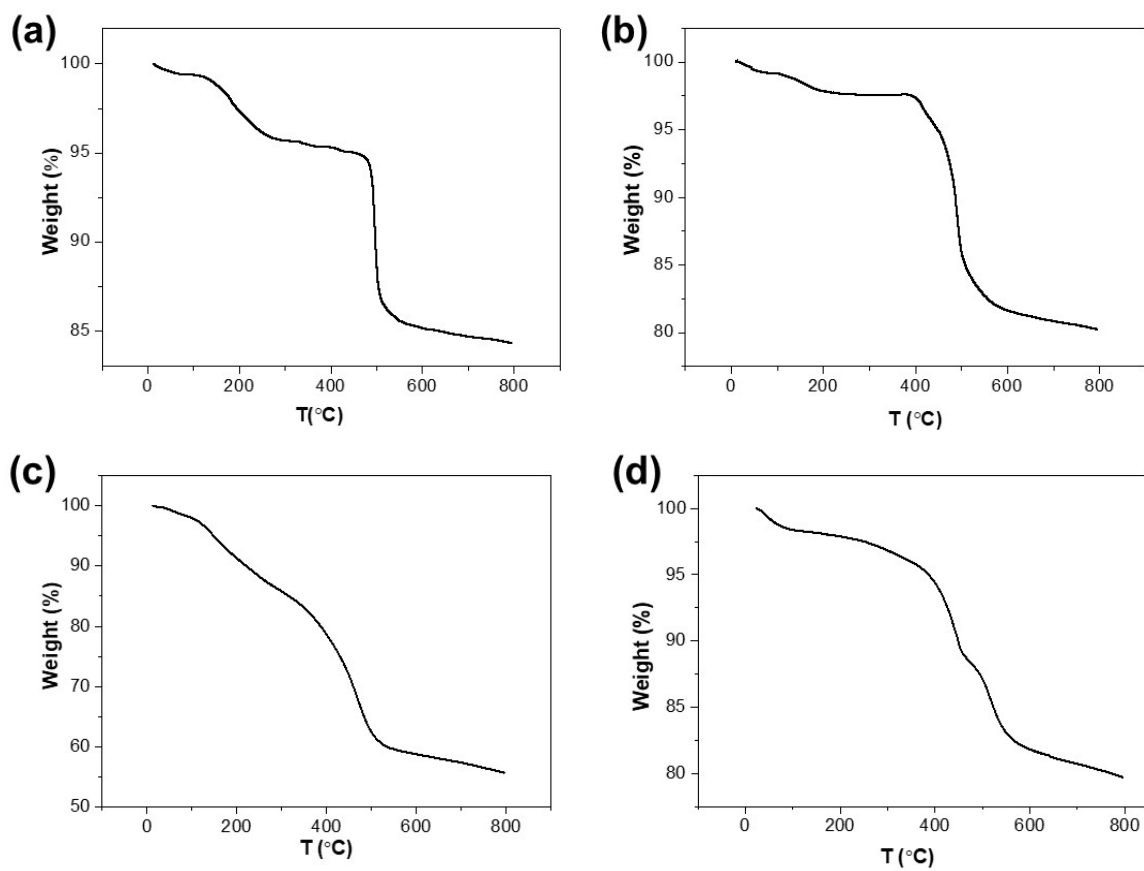

**Fig. S1** TGA diagrams of Mn-TMPP (**1**, a), Zn-TMPP (**2**, b), Mn-THPP (**3**, c) and Zn-THPP (**4**, d).

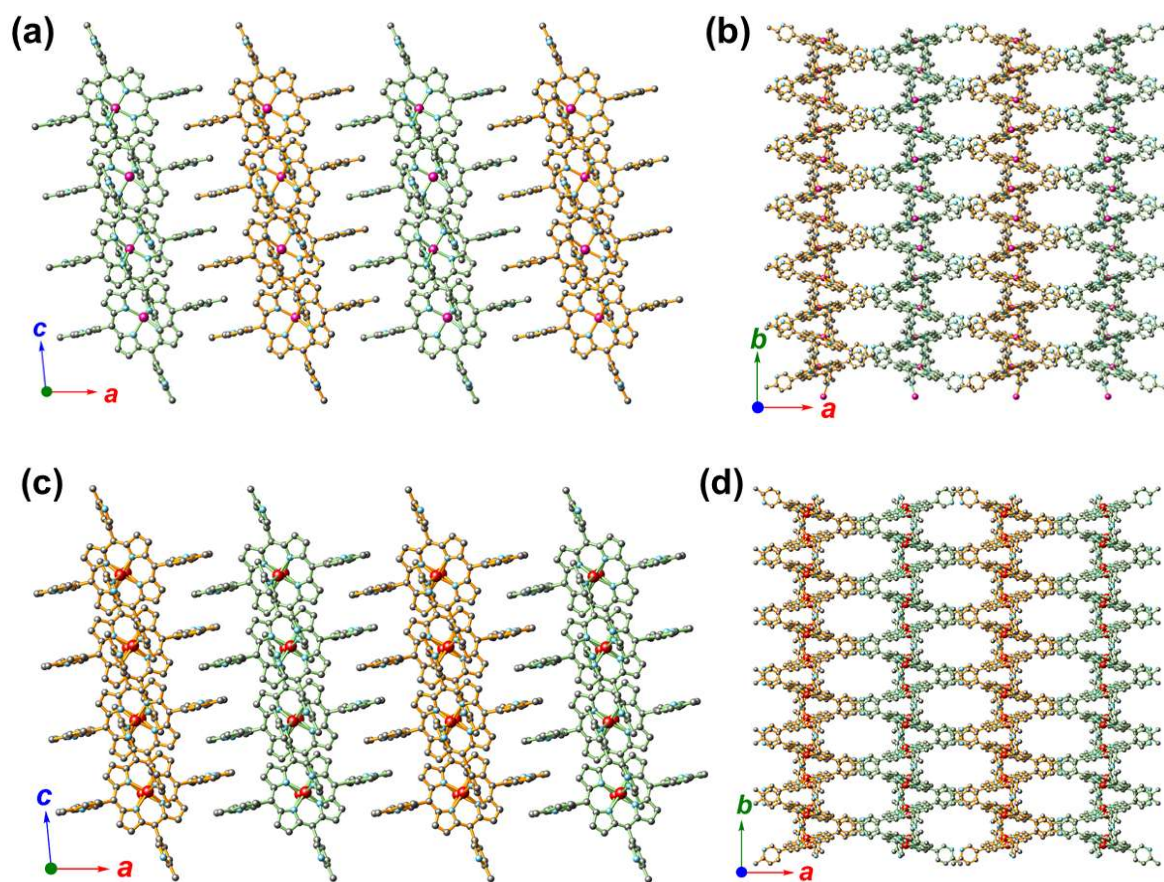

**Fig. S2** The crystal packing diagrams of Mn-TMPP (**1**, a, b) and Zn-TMPP (**2**, c, d) showing the nearly identical packing patterns when looking along the crystallographic *b* direction (a, c) and *c* direction (b, d). Colour codes: Mn (dark magenta), Zn (red), C (gray), N (cyan). The bond colors of adjacent layers are also distinguished by orange and bamboo for clarity. All disordered domain and H atoms are omitted.

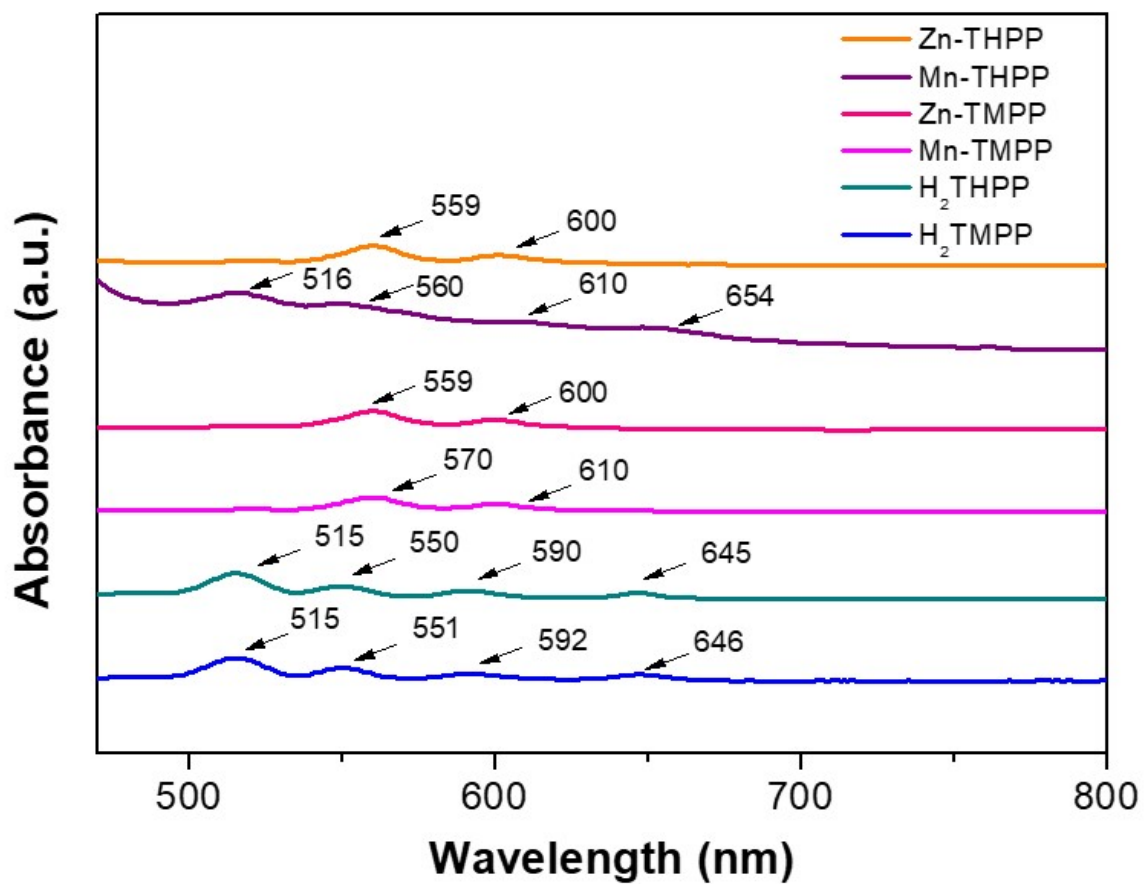

**Fig. S3** Expanded UV-Vis spectra showing the Q-band region of CPs 1–4 and their respective free-bases TMPP and THPP for comparison.

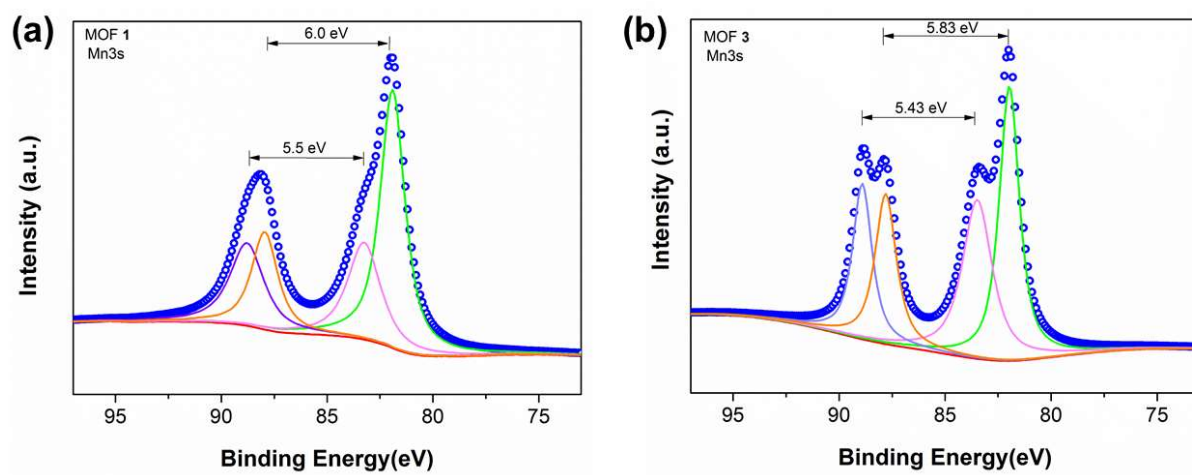

**Fig. S4** XPS spectra of MOFs **1** and **3** showing the presence of both Mn(II) and Mn(III) in the bulk samples.

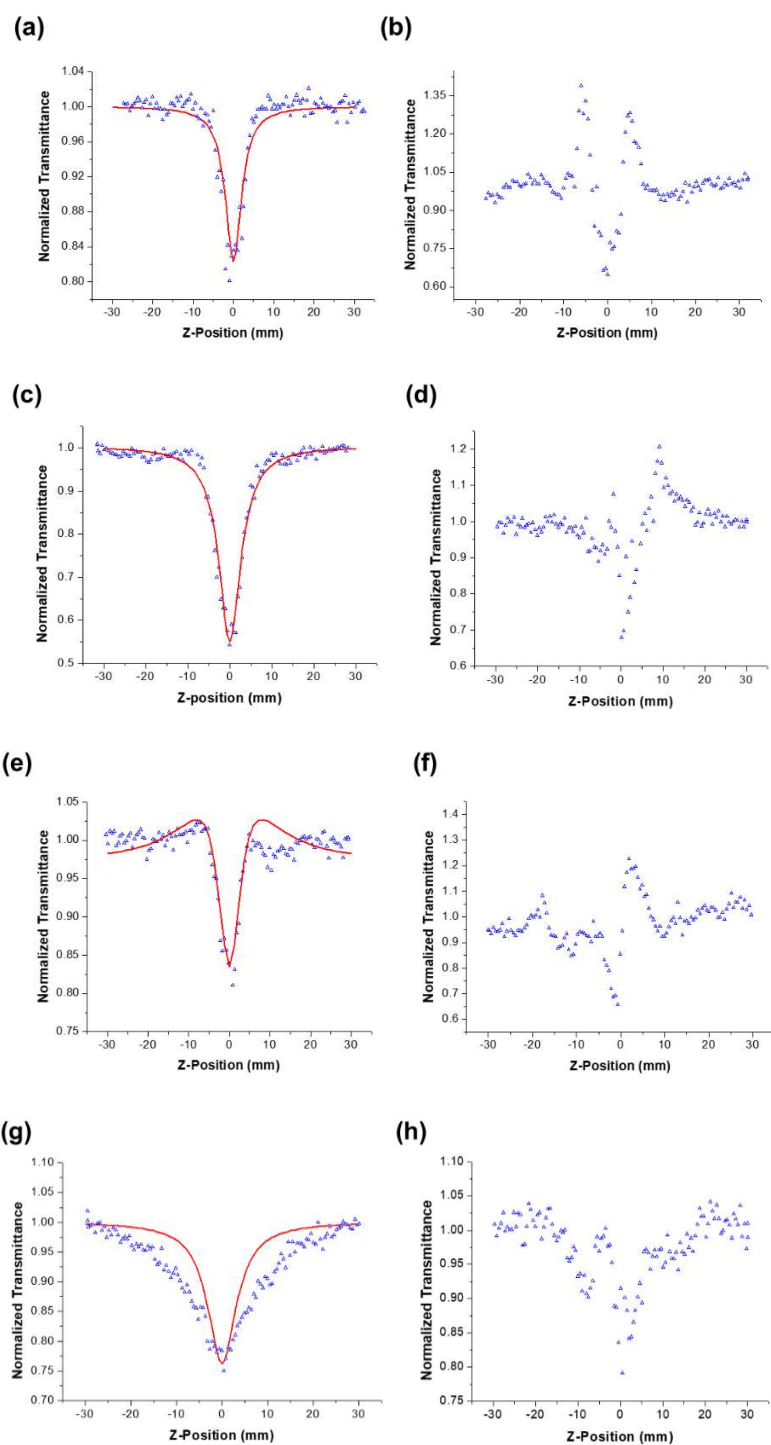

**Fig. S5** Z-scan data of **1–4** ( $1.0 \times 10^{-5} \text{ mol}\cdot\text{L}^{-1}$ , DMF solution) at 532 nm. Normalized Z-scan data under open-aperture conditions for **1–4** (a, c, e, and g). Curves obtained by dividing the normalized Z-scan data under closed aperture configuration by that in a, c, e, g (b, d, f, and h). The blue triangles are the experimental data, and the red solid curve is the theoretical fit.

**Table S1** Selected bond lengths (Å) and bond angles (°) for CPs **1–4**.

| Mn-TMPP (1)                                                                                        |            |                     |           |                     |            |
|----------------------------------------------------------------------------------------------------|------------|---------------------|-----------|---------------------|------------|
| Mn(1)-N(4)                                                                                         | 2.110(7)   | Mn(1)-N(3)          | 2.121(7)  | Mn(1)-N(1)          | 2.114(7)   |
| Mn(1)-N(2)                                                                                         | 2.126(7)   | Mn(1)-N(7)#1        | 2.236(8)  |                     |            |
| N(4)-Mn(1)-N(3)                                                                                    | 85.9(3)    | N(4)-Mn(1)-N(1)     | 87.7(3)   | N(3)-Mn(1)-N(1)     | 151.5(3)   |
| N(4)-Mn(1)-N(2)                                                                                    | 151.5(3)   | N(3)-Mn(1)-N(2)     | 86.6(3)   | N(1)-Mn(1)-N(2)     | 85.8(3)    |
| N(4)-Mn(1)-N(7)#1                                                                                  | 110.1(3)   | N(3)-Mn(1)-N(7)#1   | 107.2(3)  | N(1)-Mn(1)-N(7)#1   | 101.0(3)   |
| N(2)-Mn(1)-N(7)#1                                                                                  | 98.4(3)    |                     |           |                     |            |
| #1 $-x + 1/2, y + 1/2, -z$ .                                                                       |            |                     |           |                     |            |
| Zn-TMPP (2)                                                                                        |            |                     |           |                     |            |
| Zn(1)-Zn(1)#1                                                                                      | 1.241(2)   | Zn(1)-N(2)          | 2.045(3)  | Zn(1)-N(1)#1        | 2.129(3)   |
| Zn(1)-N(1)                                                                                         | 2.157(3)   | Zn(1)-N(2)#1        | 2.203(3)  | Zn(1)-N(4)#2        | 2.246(4)   |
| N(2)-Zn(1)-N(1)#1                                                                                  | 88.17(12)  | N(2)-Zn(1)-N(1)     | 86.15(13) | N(1)#1-Zn(1)-N(1)   | 146.35(7)  |
| N(2)-Zn(1)-N(2)#1                                                                                  | 146.28(7)  | N(1)#1-Zn(1)-N(2)#1 | 83.00(13) | N(1)-Zn(1)-N(2)#1   | 83.56(13)  |
| N(2)-Zn(1)-N(4)#2                                                                                  | 106.94(18) | N(1)#1-Zn(1)-N(4)#2 | 99.06(18) | N(1)-Zn(1)-N(4)#2   | 114.33(18) |
| N(2)#1-Zn(1)-N(4)#2                                                                                | 106.57(16) |                     |           |                     |            |
| #1 $-x + 3/2, -y + 1/2, -z + 1$ ; #2 $x, -y, z - 1/2$ .                                            |            |                     |           |                     |            |
| Mn-THPP (3)                                                                                        |            |                     |           |                     |            |
| Mn(1)-N(1)                                                                                         | 2.080(5)   | Mn(1)-N(1)#1        | 2.080(5)  | Mn(1)-N(2)          | 2.105(5)   |
| Mn(1)-N(2)#1                                                                                       | 2.105(5)   | Mn(1)-O(1)#2        | 2.310(6)  | Mn(1)-O(1)#3        | 2.310(6)   |
| N(1)-Mn(1)-N(1)#1                                                                                  | 180.0      | N(1)-Mn(1)-N(2)     | 90.2(2)   | N(1)#1-Mn(1)-N(2)   | 89.8(2)    |
| N(1)-Mn(1)-N(2)#1                                                                                  | 89.8(2)    | N(1)#1-Mn(1)-N(2)#1 | 90.2(2)   | N(2)-Mn(1)-N(2)#1   | 180.0(3)   |
| N(1)-Mn(1)-O(1)#2                                                                                  | 87.7(2)    | N(1)#1-Mn(1)-O(1)#2 | 92.3(2)   | N(2)-Mn(1)-O(1)#2   | 91.3(2)    |
| N(2)#1-Mn(1)-O(1)#2                                                                                | 88.7(2)    | N(1)-Mn(1)-O(1)#3   | 92.3(2)   | N(1)#1-Mn(1)-O(1)#3 | 87.7(2)    |
| N(2)-Mn(1)-O(1)#3                                                                                  | 88.7(2)    | N(2)#1-Mn(1)-O(1)#3 | 91.3(2)   | O(1)#2-Mn(1)-O(1)#3 | 180.0      |
| #1 $-x + 1, -y + 1, -z + 1$ ; #2 $x + 1/2, -y + 1/2, z + 1/2$ ; #3 $-x + 1/2, y + 1/2, -z + 1/2$ . |            |                     |           |                     |            |
| Zn-THPP (4)                                                                                        |            |                     |           |                     |            |
| Zn(1)-N(4)                                                                                         | 2.045(3)   | Zn(1)-N(4)#1        | 2.045(3)  | Zn(1)-N(3)#1        | 2.068(3)   |
| Zn(1)-N(3)                                                                                         | 2.068(3)   | Zn(1)-O(1)#2        | 2.265(3)  | Zn(1)-O(1)#3        | 2.265(3)   |
| N(4)-Zn(1)-N(4)#1                                                                                  | 180.0      | N(4)-Zn(1)-N(3)#1   | 89.57(13) | N(4)#1-Zn(1)-N(3)#1 | 90.43(13)  |
| N(4)-Zn(1)-N(3)                                                                                    | 90.43(13)  | N(4)#1-Zn(1)-N(3)   | 89.57(13) | N(3)#1-Zn(1)-N(3)   | 180.0      |
| N(4)-Zn(1)-O(1)#2                                                                                  | 87.76(12)  | N(4)#1-Zn(1)-O(1)#2 | 92.24(12) | N(3)#1-Zn(1)-O(1)#2 | 88.44(12)  |
| N(3)-Zn(1)-O(1)#2                                                                                  | 91.57(12)  | N(4)-Zn(1)-O(1)#3   | 92.24(12) | N(4)#1-Zn(1)-O(1)#3 | 87.76(12)  |
| N(3)#1-Zn(1)-O(1)#3                                                                                | 91.56(12)  | N(3)-Zn(1)-O(1)#3   | 88.43(12) | O(1)#2-Zn(1)-O(1)#3 | 180.00(13) |
| Symmetry codes: #1 $-x, -y + 2, -z + 1$ ; #2 $x, -y + 3/2, z + 1/2$ ; #3 $-x, y + 1/2, -z + 1/2$ . |            |                     |           |                     |            |
